# Supplementary material
Source: HighWire-hosted journal article supplement (https://cmaj.ca/highwire/filestream/59360/field_highwire_adjunct_files/2/150174-res-3-at.pdf)

**Appendix 3 (as supplied by the authors):** Preoperative testing between 2008 and 2012 by procedure type. CXR = chest radiography, ECG = electrocardiography, TTE = transthoracic echocardiography.

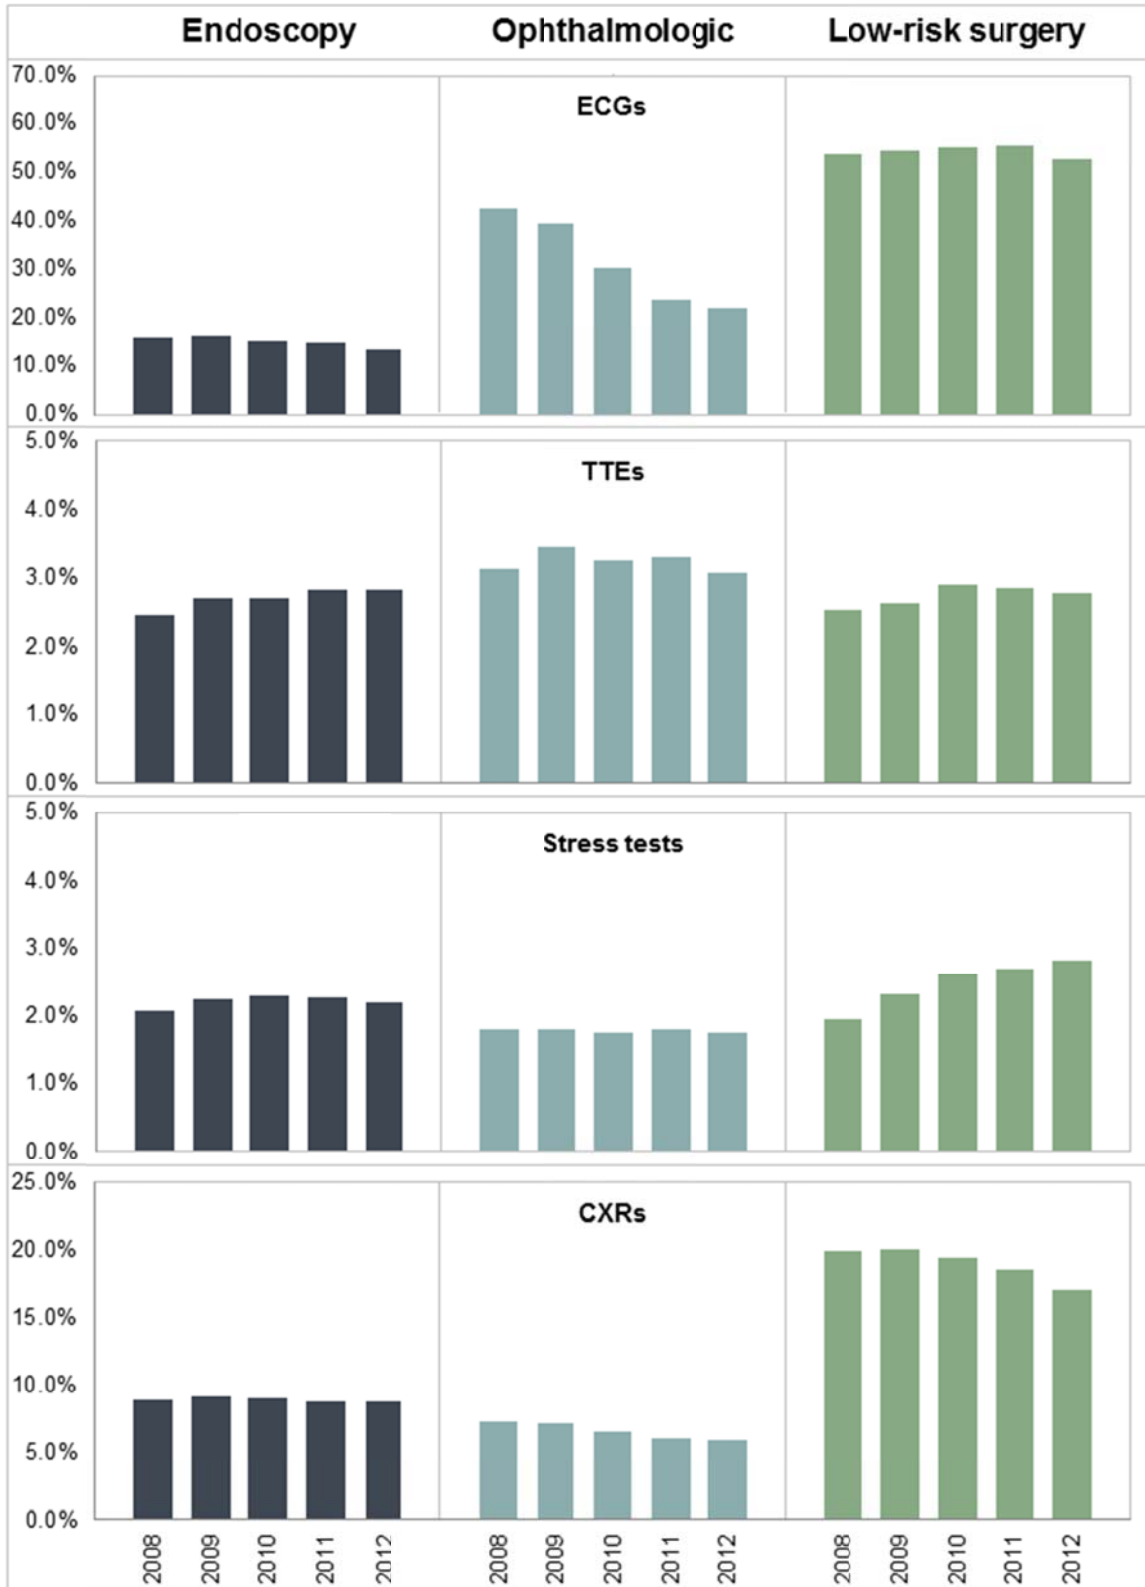

Supplement: 150174-res-3-at.pdf [file 150174-res-3-at.pdf]
